# Supplementary material
Source: MDPI journal article supplement (https://www.mdpi.com/2071-1050/5/4/1725)
Supplement: s1 [file s1]

## **Supplementary Materials**

### **Do We Teach What We Preach? An International Comparison of Problem- and Project-Based Learning Courses in Sustainability**

Katja Brundiers \* and Arnim Wiek

#### **Correction on page 1741**

The correction concerns the last two sentences in the second paragraph on page 1741:

“An important requirement, however, would be to hire a transacademic interface manager to avoid burdening faculty or staff with the dual role of academic/professional coach and interface manager [11]. However, students might want to take on the dual role of researcher/ interface manager as it offers exploring a future job profile in a comparatively save environment”.
